# Supplementary material for: Multicolour- and high-colour-contrast switching in response to force and acid vapour by introducing an asymmetric D–π–A–π–D structure
Source: Royal Society of Chemistry journal article supplement (doi:10.1039/c9tc03257f), 2019-01-01
Supplement: c9tc03257f1.pdf [file c9tc03257f1.pdf]

**Multicolour- and high-colour-contrast switches in response to force  
and acid vapour by introducing asymmetric D- $\pi$ -A- $\pi$ -D structure**

Pengchong Xue\* Tong Zhang, Yanning Han

Tianjin Key Laboratory of Structure and Performance for Functional Molecules, MOE  
Key Laboratory of Inorganic–Organic Hybrid Functional Material Chemistry, College  
of Chemistry, Tianjin Normal University No. 393, Bin Shui West Road, Tianjin, P. R.  
China.

E-mail: xuepengchong@126.com; hxyxpc@tjnu.edu.cn

**Table S1.** Photophysical data of PAN and DPIAN obtained by quantum chemical calculations.

|                       | Transition assignment  | Transition energy (eV) | Maximal absorption (nm) | Oscillator strength |
|-----------------------|------------------------|------------------------|-------------------------|---------------------|
| PAN                   | HOMO-1→ LUMO (2.64%)   | <b>2.9241</b>          | <b>424.00</b>           | <b>0.7004</b>       |
|                       | HOMO→ LUMO (95.01%)    |                        |                         |                     |
|                       | HOMO-1→ LUMO (94.21%)  | 3.4729                 | 357.01                  | 0.2964              |
|                       | HOMO→ LUMO (3.10%)     |                        |                         |                     |
|                       | HOMO-2→ LUMO (18.91%)  | 3.9682                 | 312.44                  | 0.0154              |
|                       | HOMO-1→ LUMO+1 (5.25%) |                        |                         |                     |
| HOMO→ LUMO+1 (69.54%) |                        |                        |                         |                     |
| DPIAN                 | HOMO-1→ LUMO+1 (3.74%) | <b>2.6957</b>          | <b>459.93</b>           | <b>1.4078</b>       |
|                       | HOMO→ LUMO (94.21%)    |                        |                         |                     |
|                       | HOMO-1→ LUMO (91.53%)  | 2.9418                 | 421.45                  | 0.0505              |
|                       | HOMO→ LUMO+1 (2.54%)   |                        |                         |                     |
|                       | HOMO-2→ LUMO (13.053%) | 3.3520                 | 369.88                  | 0.1670              |
|                       | HOMO-1→ LUMO (4.27%)   |                        |                         |                     |
|                       | HOMO-1→ LUMO+1 (2.42%) |                        |                         |                     |
|                       | HOMO→ LUMO+1 (72.82%)  |                        |                         |                     |

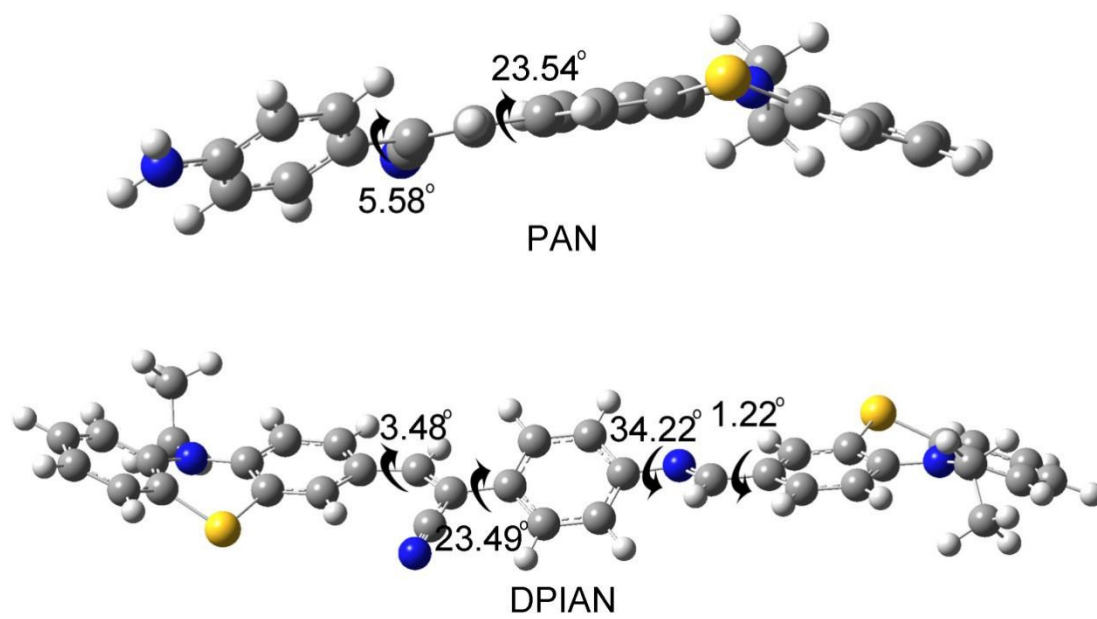

**Fig. S1** Optimized conformations of PAN and DPIAN by DFT calculations.

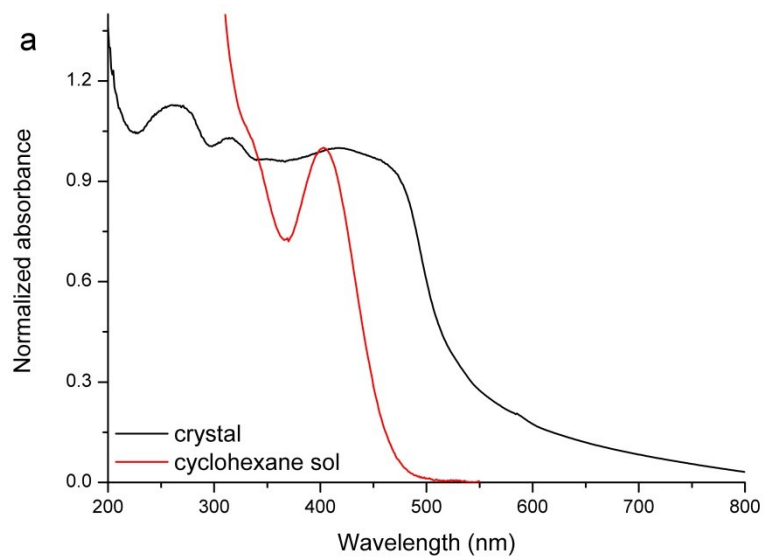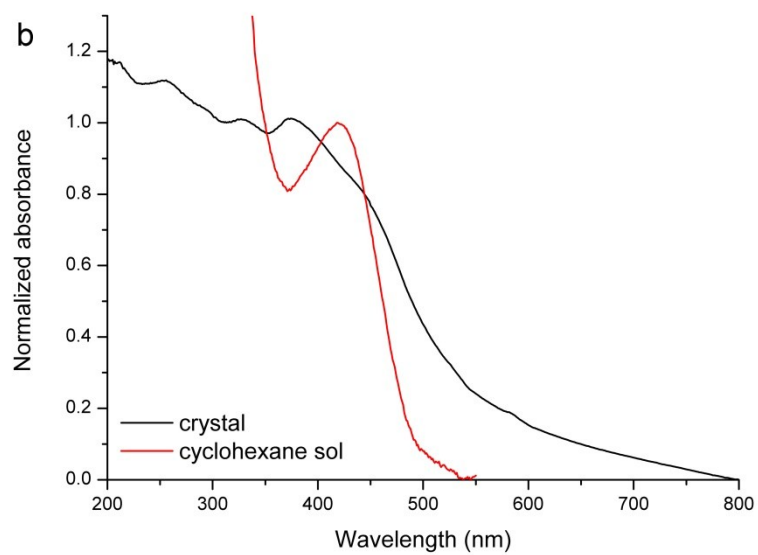

**Fig. S2** Normalized absorption spectra of (a) PAN and (b) DPIAN in cyclohexane solutions ( $c = 10^{-4}$  M) and crystal state.

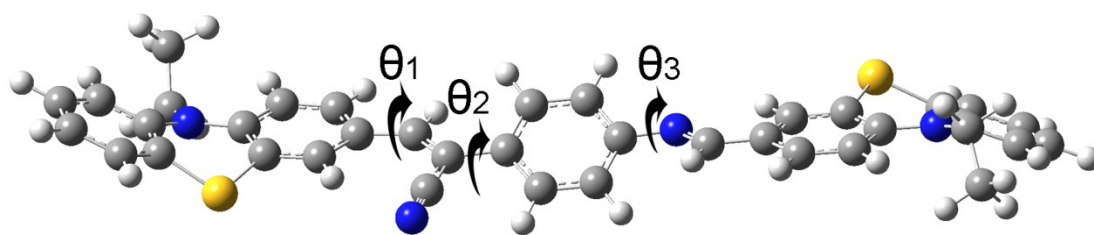

**Table S2.** Energy levels of frontier orbitals and electron transitions of DPIAN with different twisted angles.

|   | $\theta_1; \theta_2; \theta_3$ | $E_{\text{HOMO}}$ (eV) | $E_{\text{LUMO}}$ (eV) | Electron transition (nm) |
|---|--------------------------------|------------------------|------------------------|--------------------------|
| 1 | 3.48; 23.43; 34.22             | -5.00                  | -2.04                  | 459.93                   |
| 2 | 3.48; 50; 34.22                | -5.01                  | -1.92                  | 434.76                   |
| 3 | 3.48; 70; 34.22                | -5.05                  | -1.82                  | 417.06                   |
| 4 | 3.48; 50.0; 50.0               | -5.27                  | -1.81                  | 426.68                   |
| 5 | 50; 70; 34.22                  | -5.29                  | -1.70                  | 408.76                   |

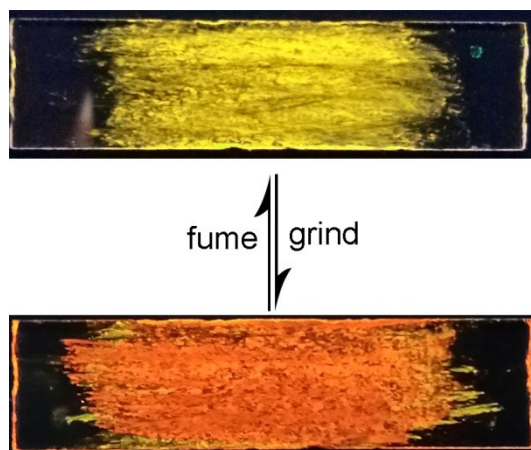

**Fig. S3** Photos of PAN in different states under 365 nm light.

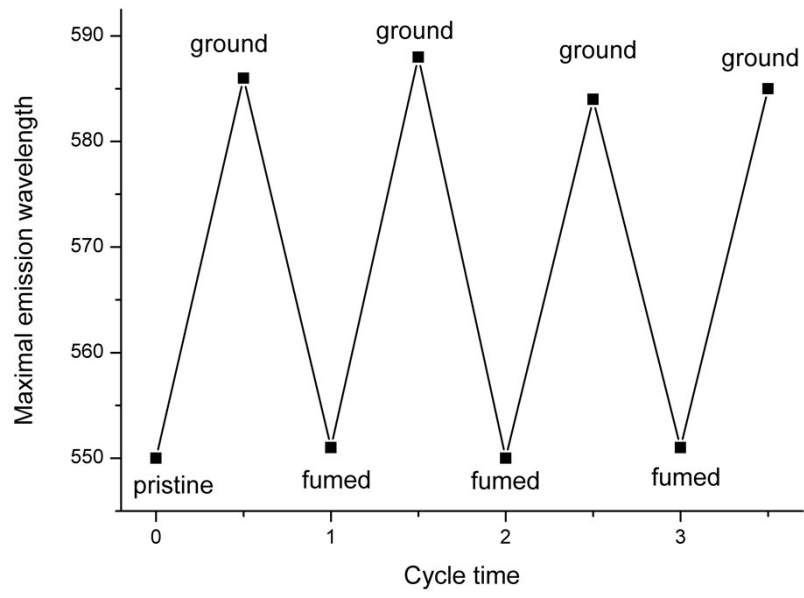

**Fig. S4** Reversible MFC process of PAN.

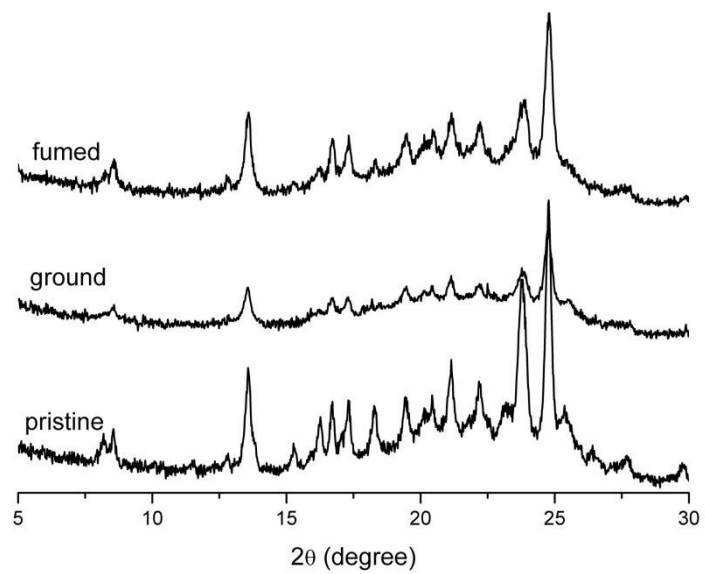

**Fig. S5** XRD patterns of PAN in different states.



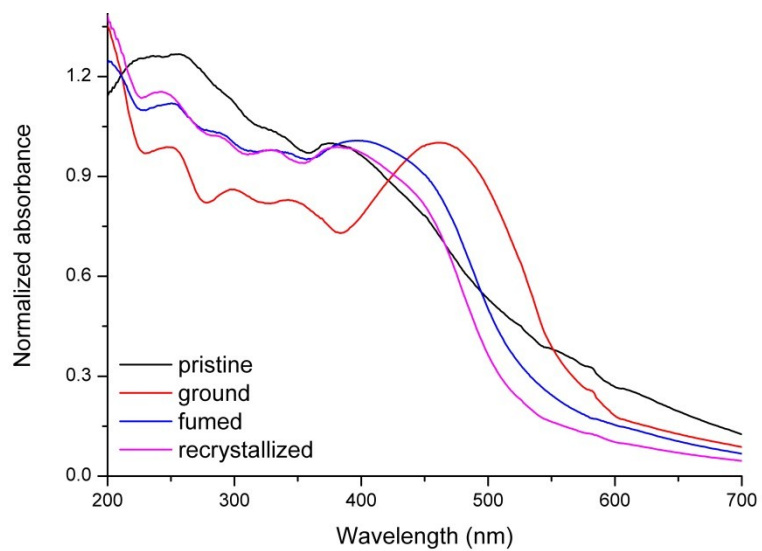

**Fig. S6** Absorption spectra of DPIAN solids in different states.

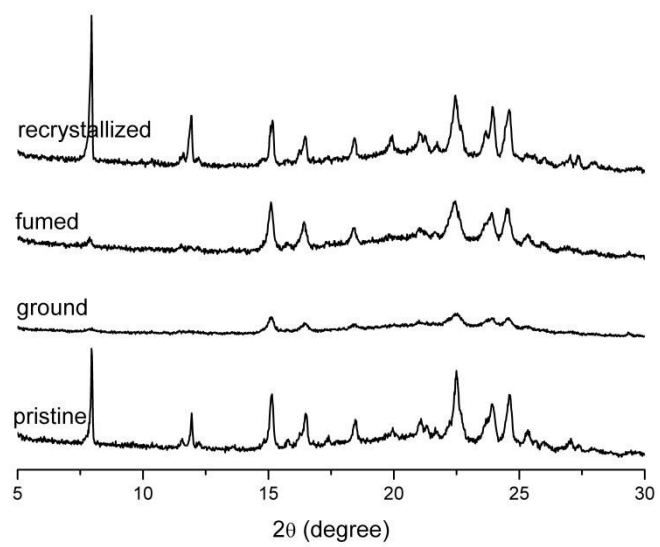

**Fig. S7** XRD patterns of DPIAN in different states.

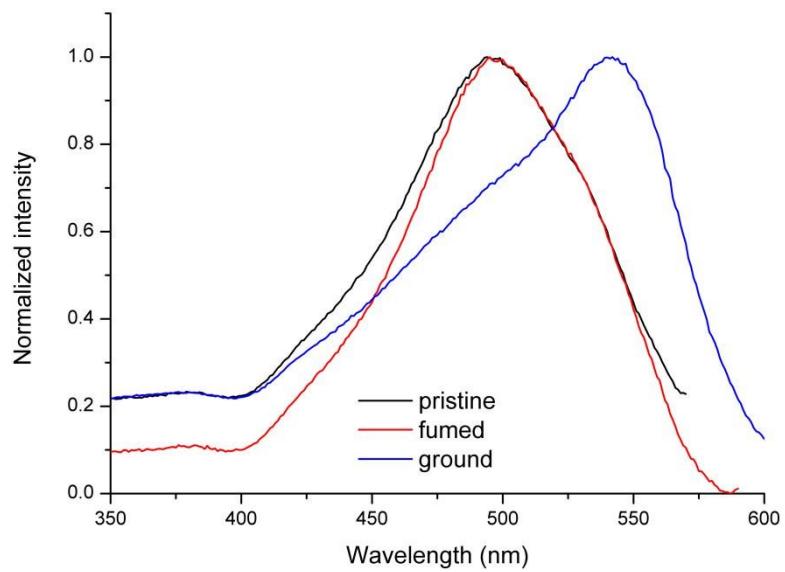

**Fig. S8** Excited spectra of DPIAN in pristine, fumed and ground states. Excitation wavelengths are 580, 600 and 620 nm, respectively.

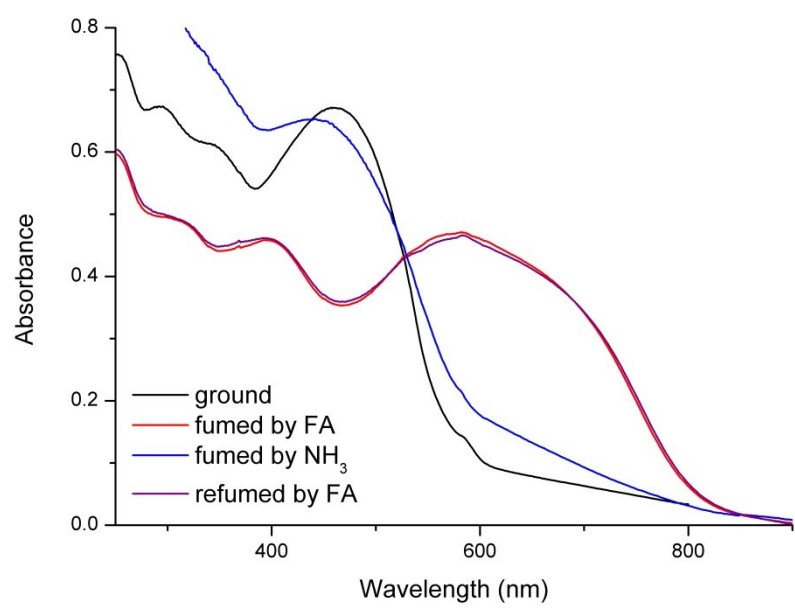

**Fig. S9** Absorption spectra of DPIAN-R in response to formic acid and NH<sub>3</sub> vapors.

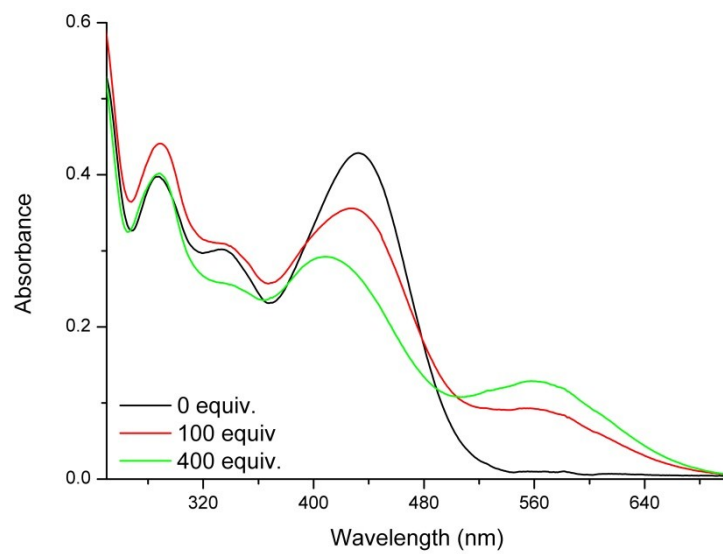

**Fig. S10** Absorption spectra of DPIAN after adding formic acid.

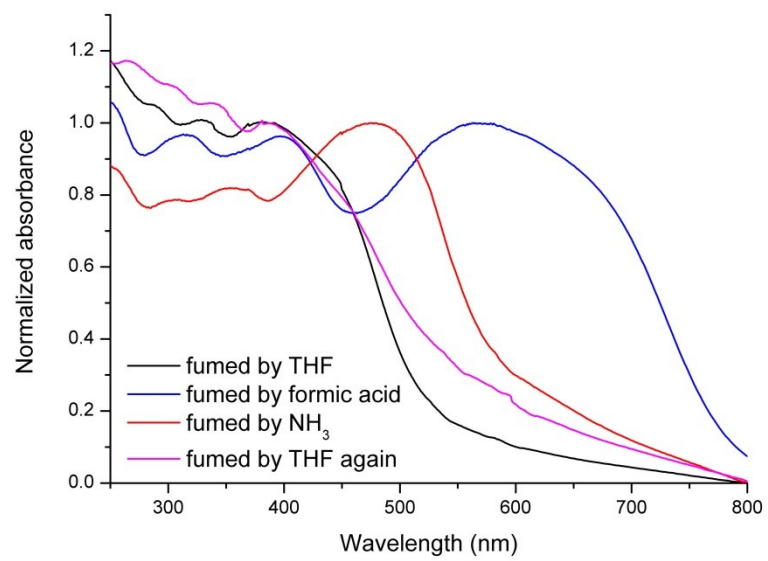

**Fig. S11** Absorption spectra of DPIAN-O in response to formic acid, NH<sub>3</sub> and THF vapors.

**Table S3.** Photophysical data of protonated DPIAN obtained by quantum chemical calculation.

|         | Transition assignment | Transition energy (eV) | Maximal absorption (nm) | Oscillator strength |
|---------|-----------------------|------------------------|-------------------------|---------------------|
|         | HOMO-2→ LUMO (4.23%)  |                        |                         |                     |
|         | HOMO-1→ LUMO (3.79%)  |                        |                         |                     |
| DPIAN+H | HOMO→ LUMO (87.14%)   | <b>2.0023</b>          | <b>619.21</b>           | <b>1.0049</b>       |
|         | HOMO→ LUMO+1 (3.58%)  |                        |                         |                     |

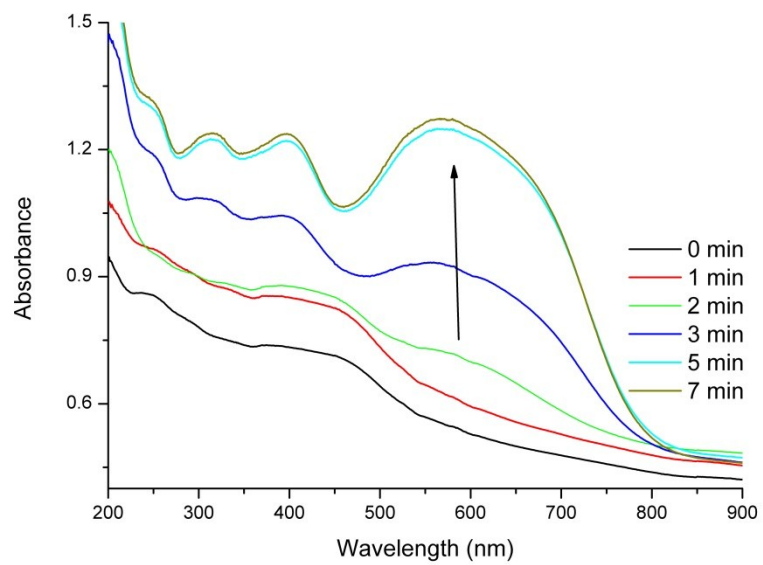

**Fig. S12** Absorption spectral change of DPIAN-O upon exposure to formic acid saturated vapor.



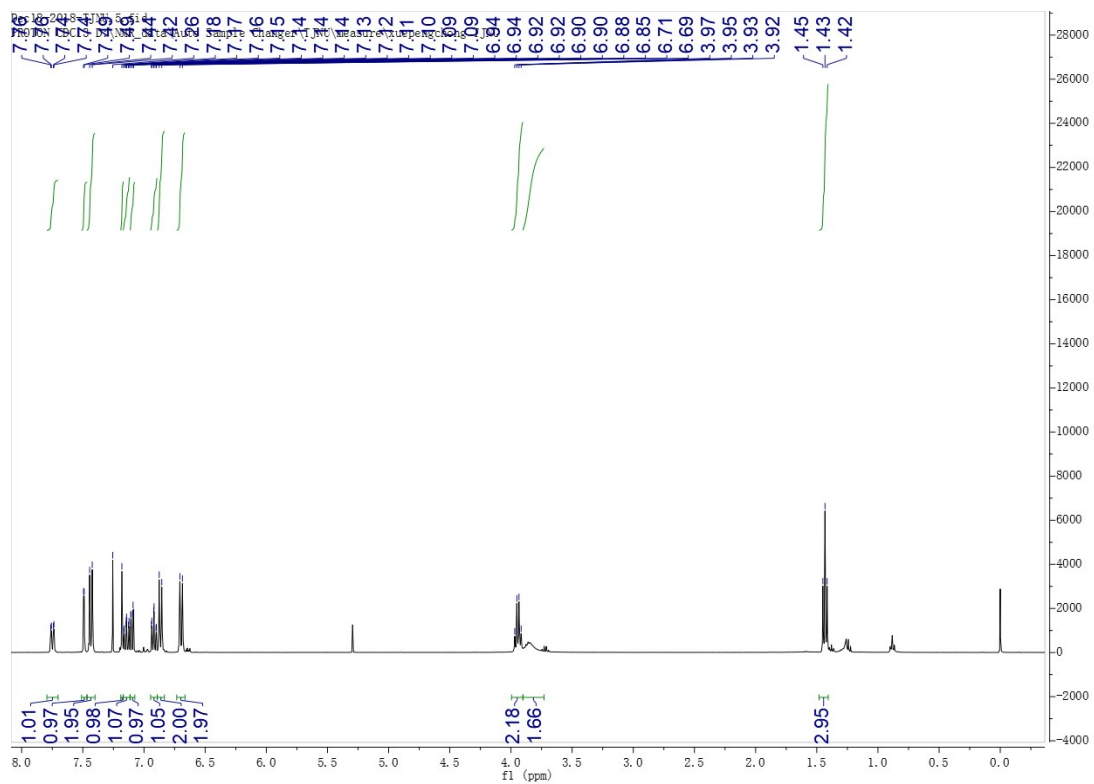

**Fig. S13**  $^1\text{H}$  NMR spectrum of PAN in  $\text{CDCl}_3$ .

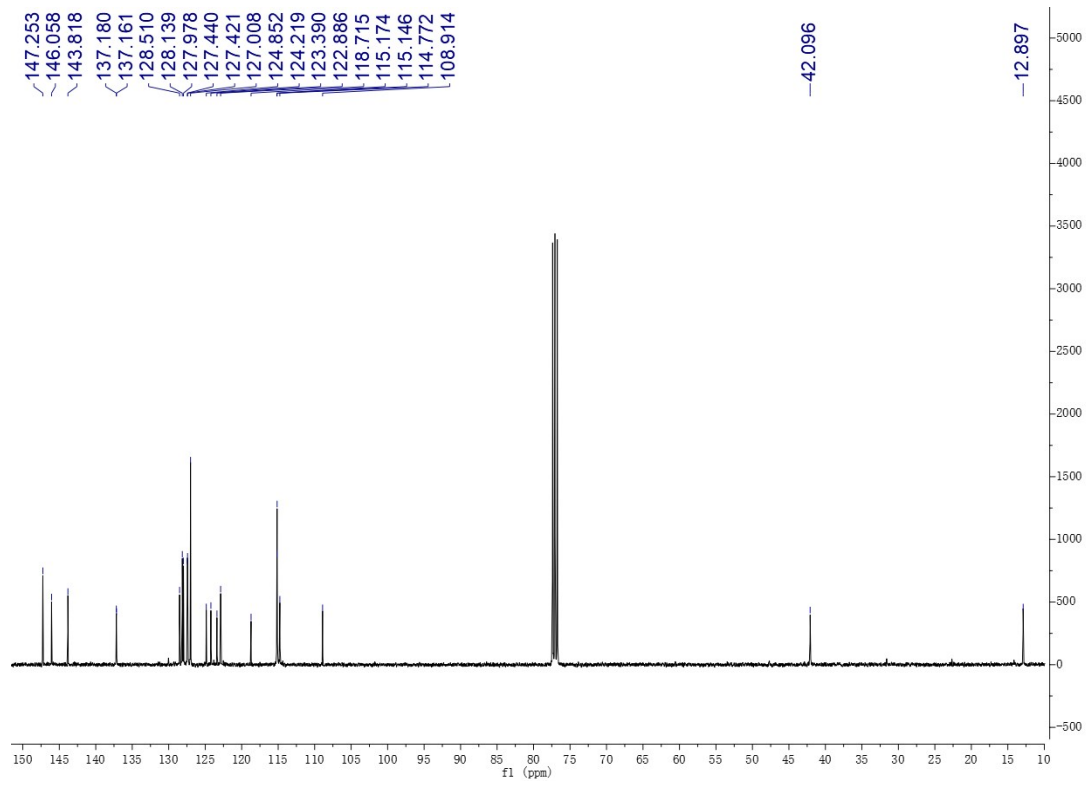

**Fig. S14**  $^{13}\text{C}$  NMR spectrum of PAN in  $\text{CDCl}_3$ .

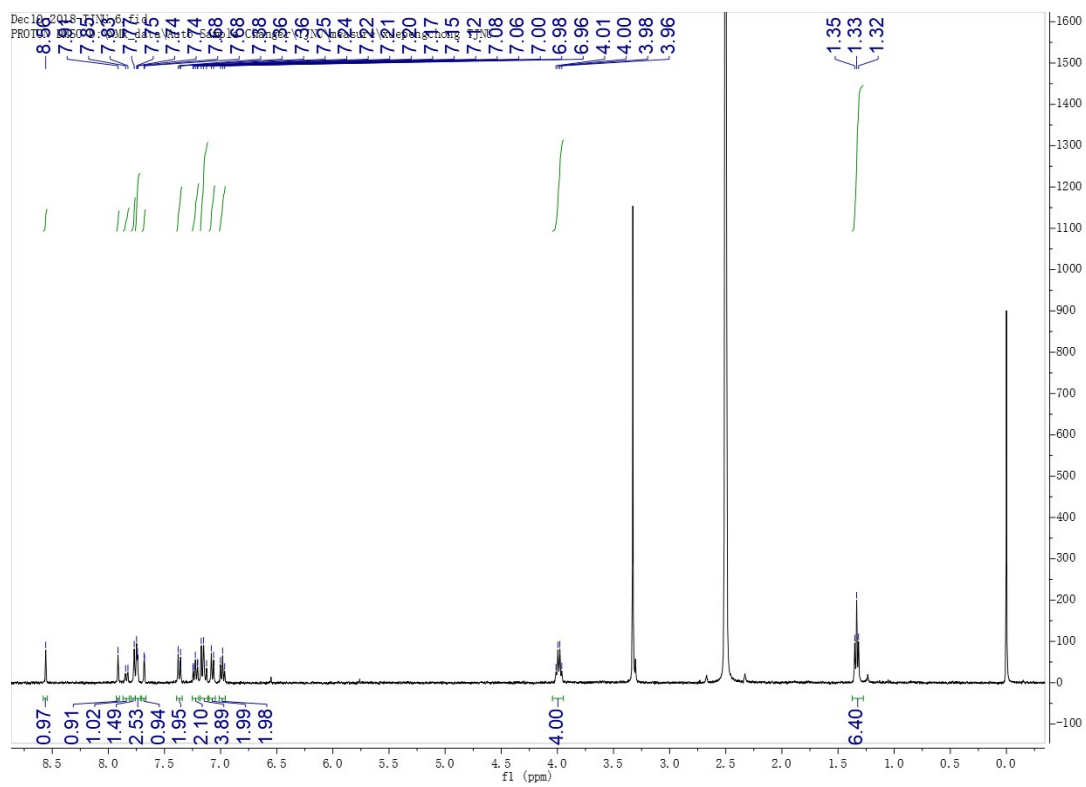

**Fig. S15**  $^1\text{H}$  NMR spectrum of DPIAN in  $\text{d}_6\text{-DMSO}$ .

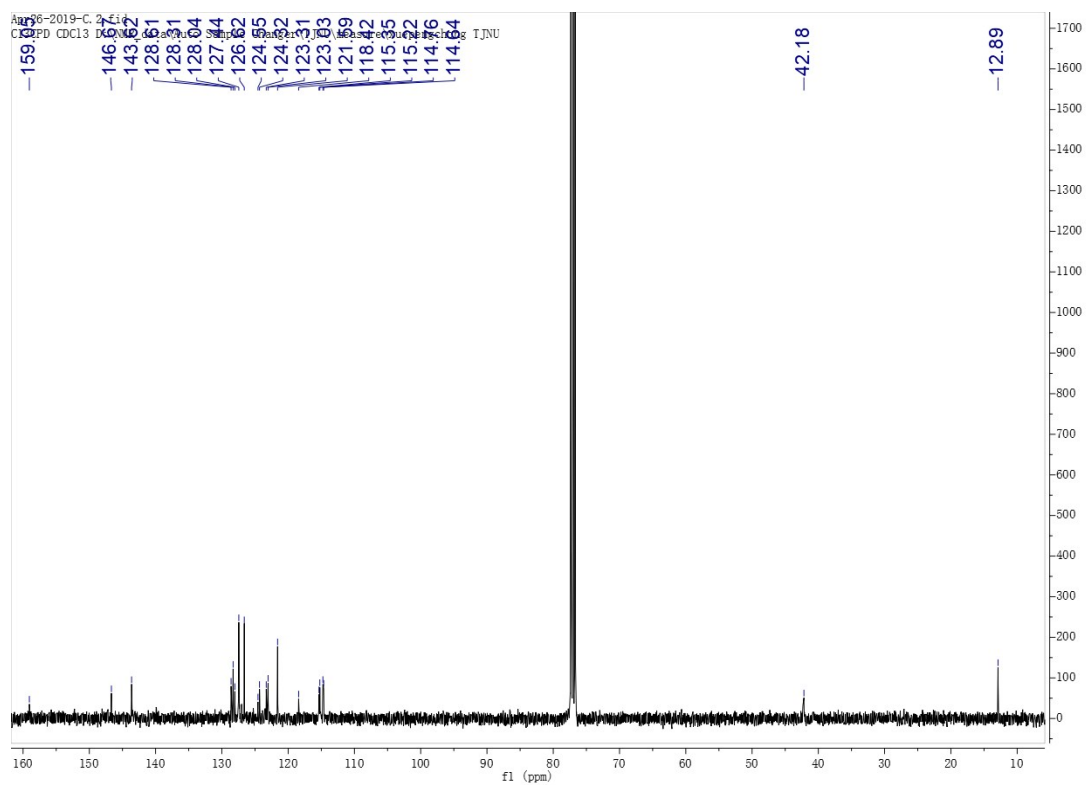

Fig. S16 <sup>13</sup>C NMR spectrum of DPIAN in CDCl<sub>3</sub>.

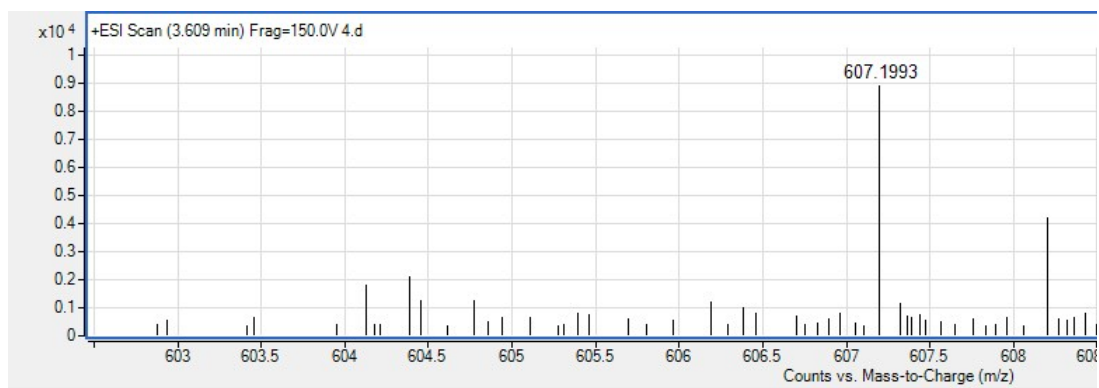

**Fig. S17** MS spectrum of DPIAN.
